# Supplementary material for: Chromosome-specific sequencing reveals an extensive dispensable genome component in wheat
Source: PubMed Central journal article supplement (PMC5099574; doi:10.1038/srep36398), 2016-11-08
Supplement: srep36398-s1.pdf [file srep36398-s1.pdf]

1 **Supplementary Figures and Tables**

2

3 **Chromosome-specific sequencing reveals an extensive dispensable genome component**  
4 **in wheat**

5

6 Miao Liu<sup>1,2</sup>, Jiri Stiller<sup>1</sup>, Kateřina Holuřová<sup>3</sup>, Jan Vrána<sup>3</sup>, Dengcai Liu<sup>2</sup>, Jaroslav Doležel<sup>3</sup>,  
7 Chunji Liu<sup>1\*,4</sup>

8

9 <sup>1</sup>CSIRO Agriculture, 306 Carmody Road, St Lucia, QLD 4067, Australia

10 <sup>2</sup>Triticeae Research Institute, Sichuan Agricultural University, Wenjiang, Chengdu 611130,  
11 China

12 <sup>3</sup>Institute of Experimental Botany, Centre of the Region Haná for Biotechnological and  
13 Agricultural Research, Šlechtitelů 31, CZ-78371 Olomouc, Czech Republic

14 <sup>4</sup>School of Plant Biology, The University of Western Australia, Perth, WA 6009, Australia

15

16 \*Corresponding author

17 E-mail: [chunji.liu@csiro.au](mailto:chunji.liu@csiro.au)

18

19

20

1  
2  
3

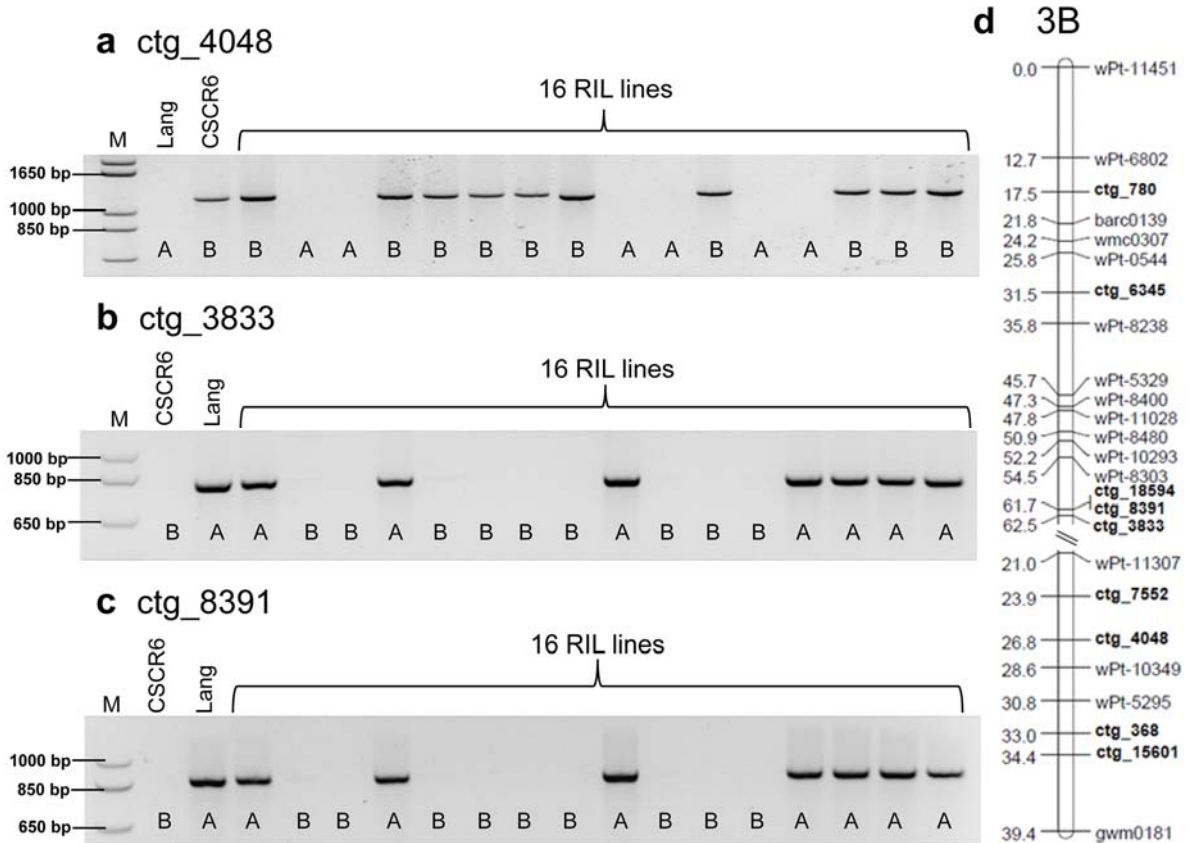

4  
5  
6  
7  
8  
9  
10  
11  
12  
13  
14

**Supplementary Figure S1. Segregations of three (a, b & c) CRNIL1A-specific contigs (ctg) in a sample of the population of recombinant inbred lines Lang/CSCR6 (left) and the locations of nine contigs in the linkage map of chromosome 3B (right). M = marker, A = allele from the female parent Lang, and B = allele from the male parent CSCR6. Map positions were based on the linkage map published by Ma *et al.*<sup>7</sup>.**

1  
2  
3  
4  
5  
6  
7  
8  
9  
10  
11  
12  
13  
14  
15  
16

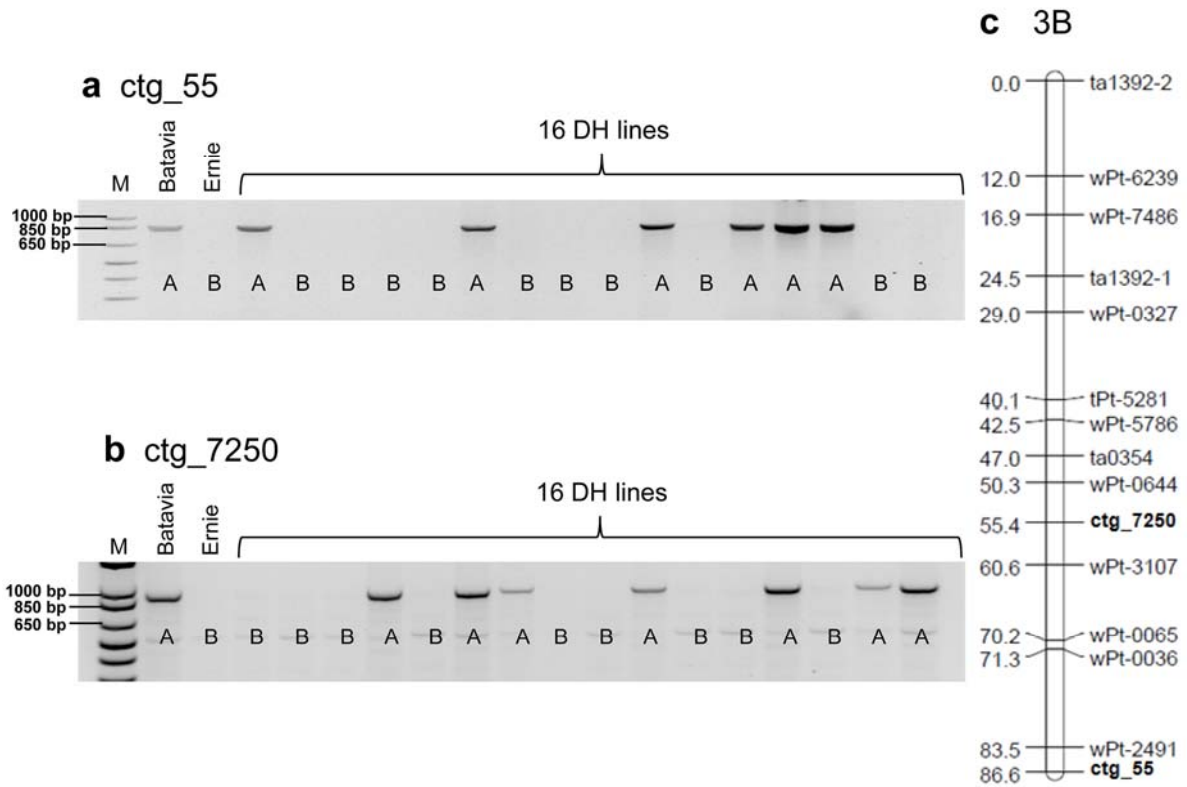

**Supplementary Figure S2. Segregations of two (a & b) CRNIL1A-specific contigs (ctg) in a sample of the doubled haploid population Batavia/Ernie (left) and their locations in the linkage map of chromosome 3B (right). M = marker, A = allele from the female parent Batavia, and B = allele from the male parent Ernie. Map positions were based on the linkage map published by Li *et al.*<sup>6</sup>.**

1  
2  
3  
4  
5

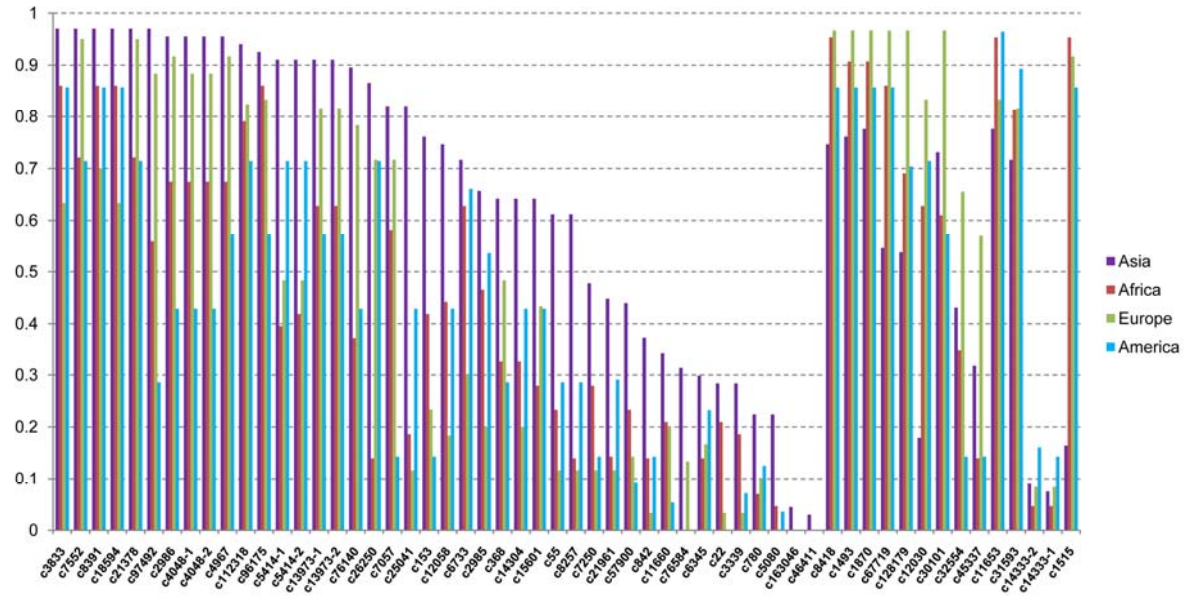

6  
7  
8  
9  
10  
11  
12  
13  
14  
15  
16  
17  
18  
19

**Supplementary Figure S3. Ratios (y-axis) of ‘CS-type’ alleles among the 226 hexaploid wheat genotypes assessed from the four different geographical regions assessed.**

1  
2  
3  
4  
5  
6  
7  
8  
9  
10  
11  
12  
13  
14  
15  
16

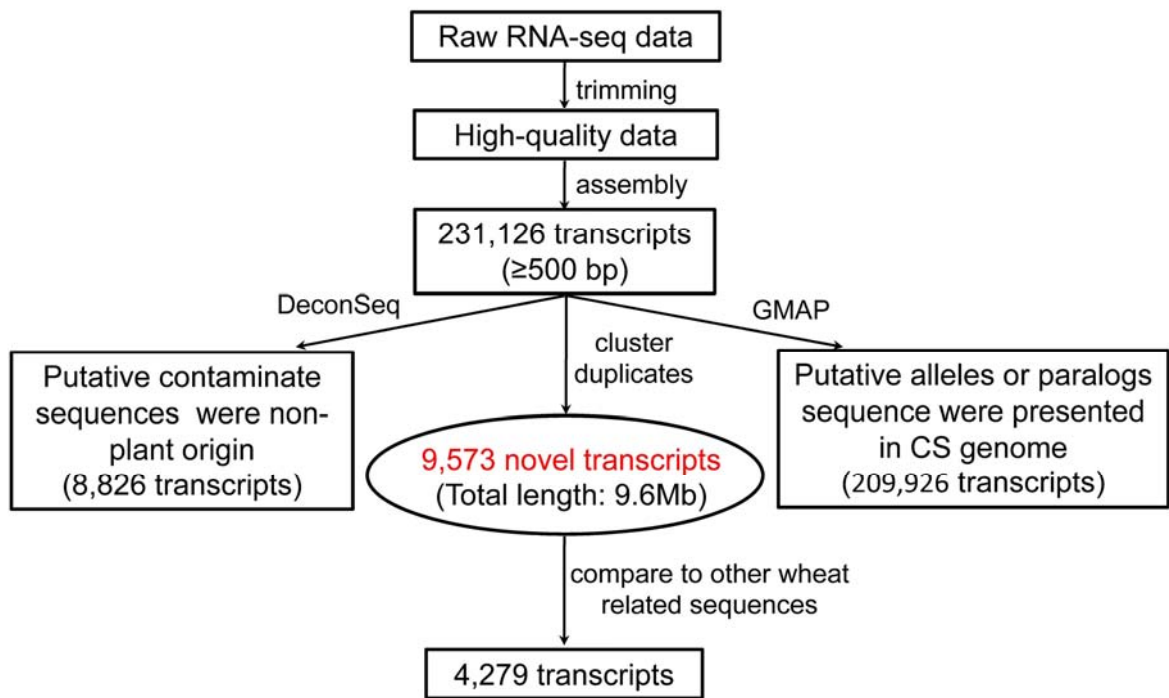

**Supplementary Figure S4. Procedure of detecting and evaluating novel transcripts not present in CS.**

1  
2

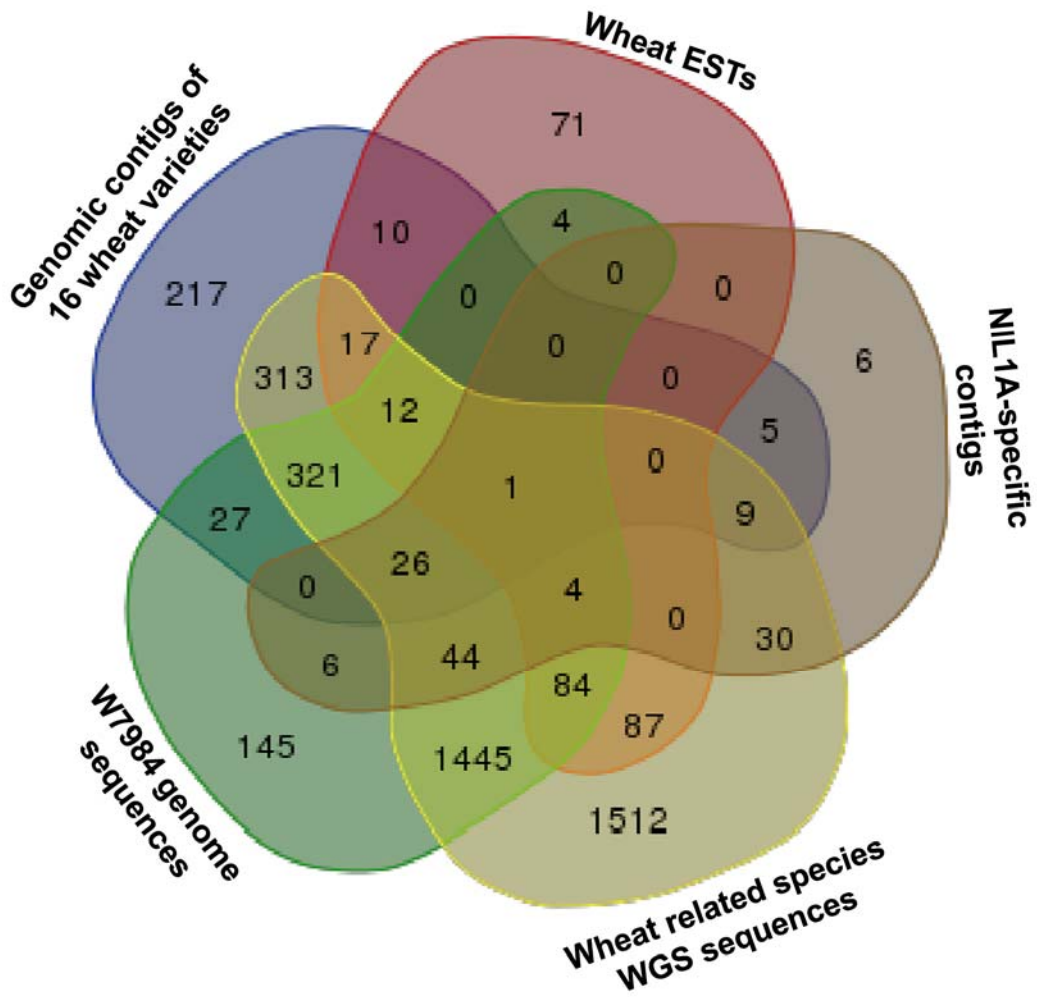

3  
4  
5  
6  
7  
8  
9  
10  
11  
12

Supplementary Figure S5. Venn diagrams showing the number of novel transcripts matched with sequences of wheat and its close relatives.

1  
2  
3  
4  
5  
6  
7  
8  
9  
10  
11  
12  
13  
14  
15

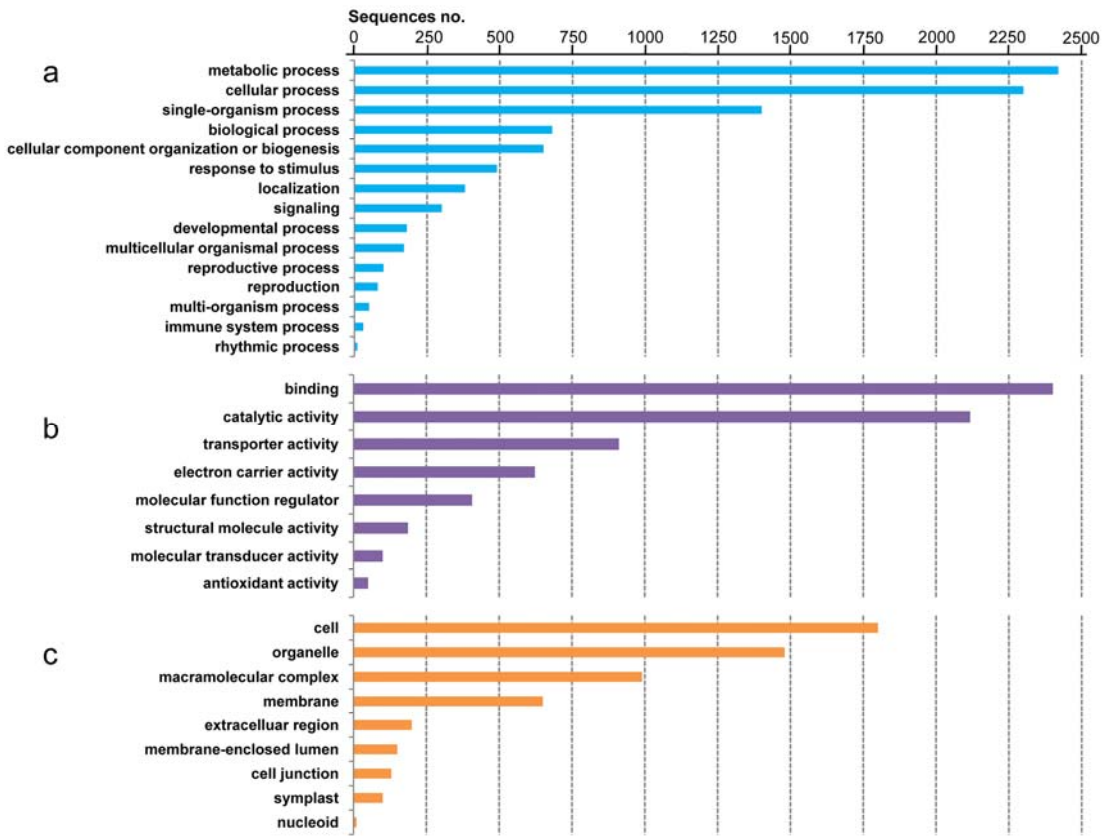

**Supplementary Figure S6. Gene Ontology classification of genes represented by the 9,573 novel transcripts.** Assignments of Gene Ontology terms for all sequences based on significant hits among various plant species are summarized into three main GO categories: (a) biological process, (b) molecular function, and (c) cellular component.

| <b>AUS.NO</b> | <b>Type</b> | <b>Origin</b> |
|---------------|-------------|---------------|
| 113           | pedigree    | CHINA         |
| 114           | cultivar    | CHINA         |
| 137           | cultivar    | MEXICO        |
| 239           | cultivar    | ITALY         |
| 240           | cultivar    | ITALY         |
| 243           | cultivar    | ITALY         |
| 244           | cultivar    | ITALY         |
| 347           | cultivar    | UNITED STATES |
| 352           | cultivar    | UNITED STATES |
| 387           | cultivar    | MEXICO        |
| 420           | pedigree    | ARGENTINA     |
| 423           | cultivar    | ARGENTINA     |
| 458           | cultivar    | MEXICO        |
| 643           | cultivar    | UNITED STATES |
| 680           | cultivar    | MEXICO        |
| 688           | cultivar    | CHINA         |
| 699           | collection  | SPAIN         |
| 727           | cultivar    | MEXICO        |
| 761           | cultivar    | PAKISTAN      |
| 769           | cultivar    | MEXICO        |
| 829           | Landrace    | INDIA         |
| 831           | Landrace    | SOUTH AFRICA  |
| 859           | cultivar    | UNITED STATES |
| 860           | cultivar    | UNITED STATES |
| 1012          | cultivar    | CANADA        |
| 1180          | cultivar    | ITALY         |
| 1183          | cultivar    | JAPAN         |
| 1201          | cultivar    | INDIA         |
| 1305          | cultivar    | SOUTH AFRICA  |
| 1395          | cultivar    | MEXICO        |
| 1421          | Landrace    | PORTUGAL      |
| 1556          | cultivar    | UNITED STATES |
| 1574          | cultivar    | FRANCE        |
| 1576          | cultivar    | FRANCE        |
| 1578          | cultivar    | ITALY         |
| 1579          | cultivar    | ITALY         |
| 1583          | cultivar    | ITALY         |
| 1695          | cultivar    | MEXICO        |
| 1725          | cultivar    | YUGOSLAVIA    |
| 1726          | cultivar    | YUGOSLAVIA    |
| 1739          | cultivar    | CHINA         |
| 1808          | pedigree    | MEXICO        |
| 1815          | cultivar    | ITALY         |
| 1818          | cultivar    | ITALY         |
| 1831          | cultivar    | ITALY         |



|      |            |               |
|------|------------|---------------|
| 2004 | cultivar   | BRAZIL        |
| 2038 | pedigree   | MOROCCO       |
| 2048 | cultivar   | UNITED STATES |
| 2126 | pedigree   | CHILE         |
| 2162 | cultivar   | BRAZIL        |
| 2164 | cultivar   | BRAZIL        |
| 2165 | cultivar   | BRAZIL        |
| 2191 | cultivar   | UNITED STATES |
| 2564 | cultivar   | UNITED STATES |
| 2731 | cultivar   | KENYA         |
| 2762 | cultivar   | ARGENTINA     |
| 2933 | Landrace   | EGYPT         |
| 2952 | cultivar   | MEXICO        |
| 2964 | cultivar   | CANADA        |
| 2995 | cultivar   | ITALY         |
| 3185 | cultivar   | CANADA        |
| 3273 | cultivar   | CANADA        |
| 4008 | pedigree   | CANADA        |
| 4101 | collection | AFGHANISTAN   |
| 4102 | collection | AFGHANISTAN   |
| 4103 | collection | AFGHANISTAN   |
| 4104 | collection | AFGHANISTAN   |
| 4201 | cultivar   | YUGOSLAVIA    |
| 4202 | cultivar   | YUGOSLAVIA    |
| 4570 | pedigree   | EGYPT         |
| 4639 | collection | INDIA         |
| 4640 | collection | INDIA         |
| 4643 | collection | INDIA         |
| 4645 | collection | INDIA         |
| 4655 | pedigree   | INDIA         |
| 4902 | collection | IRAQ          |
| 4903 | collection | IRAQ          |
| 4905 | collection | IRAQ          |
| 4906 | collection | IRAQ          |
| 4907 | collection | IRAQ          |
| 4910 | collection | IRAQ          |
| 4911 | collection | IRAQ          |
| 4912 | collection | IRAQ          |
| 4915 | collection | IRAQ          |
| 4917 | collection | IRAQ          |
| 4918 | collection | IRAQ          |
| 4919 | collection | IRAQ          |
| 5296 | pedigree   | PORTUGAL      |
| 5297 | collection | PORTUGAL      |
| 5298 | pedigree   | PORTUGAL      |
| 5981 | pedigree   | KENYA         |
| 6008 | pedigree   | KENYA         |
| 6082 | pedigree   | MEXICO        |

|       |          |              |
|-------|----------|--------------|
| 6105  | pedigree | MEXICO       |
| 6106  | pedigree | MEXICO       |
| 6497  | Landrace | INDIA        |
| 6621  | pedigree | ARGENTINA    |
| 6622  | pedigree | ARGENTINA    |
| 6938  | Landrace | YUGOSLAVIA   |
| 6972  | Landrace | TUNISIA      |
| 6980  | Landrace | SPAIN        |
| 7054  | Landrace | CHINA        |
| 7059  | Landrace | CHINA        |
| 7061  | pedigree | ARGENTINA    |
| 7062  | pedigree | ARGENTINA    |
| 7279  | cultivar | CHINA        |
| 7358  | cultivar | CHINA        |
| 7439  | cultivar | CHINA        |
| 7472  | Landrace | JAPAN        |
| 7473  | Landrace | JAPAN        |
| 7476  | cultivar | MEXICO       |
| 7804  | Landrace | AFGHANISTAN  |
| 7869  | Landrace | AFGHANISTAN  |
| 7884  | Landrace | SPAIN        |
| 7906  | Landrace | TUNISIA      |
| 8556  | Landrace | EGYPT        |
| 8626  | Landrace | INDIA        |
| 8920  | Landrace | YUGOSLAVIA   |
| 8921  | Landrace | YUGOSLAVIA   |
| 9049  | Landrace | SPAIN        |
| 10073 | Landrace | TUNISIA      |
| 10462 | cultivar | YUGOSLAVIA   |
| 10505 | pedigree | CANADA       |
| 10636 | cultivar | SOUTH AFRICA |
| 10722 | Landrace | SPAIN        |
| 10844 | cultivar | HUNGARY      |
| 10895 | cultivar | NETHERLANDS  |
| 10896 | cultivar | SYRIA        |
| 11934 | cultivar | CHILE        |
| 12007 | pedigree | KENYA        |
| 12034 | cultivar | MEXICO       |
| 12036 | cultivar | MEXICO       |
| 12042 | pedigree | ARGENTINA    |
| 12044 | pedigree | ARGENTINA    |
| 12242 | cultivar | IRAN         |
| 12298 | cultivar | ARGENTINA    |
| 12347 | cultivar | PORTUGAL     |
| 12548 | cultivar | COLOMBIA     |
| 12583 | pedigree | COLOMBIA     |
| 12584 | pedigree | COLOMBIA     |
| 12631 | pedigree | KENYA        |

|       |            |              |
|-------|------------|--------------|
| 12638 | pedigree   | KENYA        |
| 12726 | pedigree   | KENYA        |
| 13124 | collection | MOROCCO      |
| 13129 | Landrace   | MOROCCO      |
| 13130 | Landrace   | MOROCCO      |
| 13131 | Landrace   | MOROCCO      |
| 13132 | Landrace   | MOROCCO      |
| 13133 | Landrace   | MOROCCO      |
| 13179 | Landrace   | TUNISIA      |
| 13182 | Landrace   | TUNISIA      |
| 13807 | Landrace   | AFGHANISTAN  |
| 13828 | pedigree   | SOUTH AFRICA |
| 13832 | pedigree   | SOUTH AFRICA |
| 13833 | pedigree   | SOUTH AFRICA |
| 13835 | pedigree   | SOUTH AFRICA |
| 13855 | cultivar   | IRAN         |
| 13906 | cultivar   | CHINA        |
| 13907 | cultivar   | CHINA        |
| 13908 | cultivar   | CHINA        |
| 13911 | cultivar   | CHINA        |
| 13917 | cultivar   | CHINA        |
| 13918 | cultivar   | CHINA        |
| 13921 | cultivar   | CHINA        |
| 14195 | Landrace   | ALGERIA      |
| 14345 | pedigree   | SWEDEN       |
| 14446 | collection | AFGHANISTAN  |
| 14495 | collection | AFGHANISTAN  |
| 14936 | cultivar   | ITALY        |
| 15137 | Landrace   | PORTUGAL     |
| 15164 | Landrace   | INDIA        |
| 15176 | cultivar   | BULGARIA     |
| 15659 | cultivar   | ITALY        |
| 15726 | pedigree   | ROMANIA      |
| 15727 | pedigree   | ROMANIA      |
| 15728 | pedigree   | ROMANIA      |
| 15729 | pedigree   | ROMANIA      |
| 15730 | pedigree   | ROMANIA      |
| 15731 | pedigree   | ROMANIA      |
| 16101 | pedigree   | BRAZIL       |
| 16356 | pedigree   | ROMANIA      |
| 16949 | cultivar   | ITALY        |
| 17210 | cultivar   | IRAN         |
| 17304 | cultivar   | TUNISIA      |
| 17484 | cultivar   | BULGARIA     |
| 17513 | pedigree   | MOROCCO      |
| 18368 | pedigree   | SOUTH AFRICA |
| 18369 | pedigree   | SOUTH AFRICA |
| 18433 | cultivar   | CANADA       |

|       |            |              |
|-------|------------|--------------|
| 18541 | cultivar   | BRAZIL       |
| 19068 | Landrace   | AFGHANISTAN  |
| 19459 | Landrace   | AFGHANISTAN  |
| 19468 | Landrace   | IRAN         |
| 19516 | cultivar   | ITALY        |
| 19524 | cultivar   | ITALY        |
| 19573 | cultivar   | SOUTH AFRICA |
| 19598 | cultivar   | ZIMBABWE     |
| 19722 | Landrace   | EGYPT        |
| 20089 | Landrace   | JAPAN        |
| 20486 | cultivar   | ITALY        |
| 20537 | Landrace   | SAUDI ARABIA |
| 20574 | cultivar   | EGYPT        |
| 20806 | cultivar   | ROMANIA      |
| 20839 | pedigree   | SOUTH AFRICA |
| 20870 | cultivar   | KENYA        |
| 20870 | cultivar   | KENYA        |
| 21732 | cultivar   | SWITZERLAND  |
| 21738 | cultivar   | CHILE        |
| 22166 | cultivar   | FRANCE       |
| 23101 | cultivar   | KOREA, SOUTH |
| 23102 | cultivar   | ROMANIA      |
| 23934 | cultivar   | ITALY        |
| 24467 | cultivar   | ROMANIA      |
| 24705 | cultivar   | HUNGARY      |
| 24927 | Landrace   | KYRGYZSTAN   |
| 25691 | cultivar   | CHILE        |
| 26904 | Landrace   | CHINA        |
| 26906 | Landrace   | CHINA        |
| 26907 | Landrace   | CHINA        |
| 27302 | collection | COLOMBIA     |
| 27673 | Landrace   | ARMENIA      |
| 27674 | cultivar   | SWEDEN       |
| 30123 | cultivar   | ROMANIA      |
| 36464 | Landrace   | IRAQ         |
| 36467 | Landrace   | IRAQ         |
| 95153 | pedigree   | ROMANIA      |

1

2

3 **Supplementary Table S1. Details of the 226 accessions of bread wheat genotypes selected**

4 **to represent the four different geographical regions assessed.**

5

6

| Contig name   | Forward primer (5'-3')    | Reverse primer (5'-3')    | Expected/Product size (bp) | Annealing temperature (°C) |
|---------------|---------------------------|---------------------------|----------------------------|----------------------------|
| contig_22     | CGGCGGTGGTGTGGTTAATTCC    | AGAGGGAGGGAGGGAGGGTG      | 843                        | 60                         |
| contig_55     | TCCAGGGGAGAAATTGGGCT      | TCTGGGATGCATTGTGGGTG      | 861                        | 60                         |
| contig_142    | CGAGCGATGAAGGAGGAGGC      | ACAGATTGTCGGTTGCAAGGC     | 962                        | FAILED                     |
| contig_153    | CGCTCTCCGTCCAATTCCTCA     | ACCAATCCACACAACACGCTGGA   | 1236                       | 60                         |
| contig_368    | TGCATGGCTTCATAAACACCCT    | ACCAACAACACCCTGTCCAACA    | 808                        | 60                         |
| contig_780    | GGCAAATTCTCGGGCGGAA       | GCCTCATTCGTGCCACCTCT      | 750                        | 60                         |
| contig_842    | TTCGCTGGTTGGGCTGTGCA      | CCTTGCTGGTTTCTGGGTGGT     | 1484                       | 60                         |
| contig_1493   | TGATGAGAATCAAATGGGCAAGGCA | TCTGACGGATGCTGAGTGAGGC    | 1376                       | 60                         |
| contig_1515   | AGCTCCCACAGTCCCATGCT      | CTATGTGCCGCCGTTGTGA       | 990                        | 58                         |
| contig_1870   | CCCCTTTAGACTGCGAGCCA      | TCAGTCGGTCAGCTCTGGTG      | 910                        | 63                         |
| contig_2985   | GCAAGCGGGCAATCAAACCTCA    | TCCGGTGCGATGTTGGACGT      | 1457                       | 60                         |
| contig_2986   | TGACAGACGTAGCCCCACATG     | CAGGCGTTCAACTGGGTCT       | 815                        | 55                         |
| contig_3339   | CCGCTTGATTTGTGATCCGATGA   | TGCCCCGCGTAAAGTTTGGTG     | 1272                       | 60                         |
| contig_3833   | TCCATCTACAGGGAGCAGTCGT    | GCCTTTGTGTTCCATGCGGTG     | 793                        | 60                         |
| contig_4048-1 | GGGGTCCTTGAAGTGGTAAAGTG   | TCTCTGGCAAGCTATGGTAGGGA   | 1094                       | 55                         |
| contig_4048-2 | ACATGGGGATGGGCTTGACG      | ATGTGTGCGTACTCTCCGGT      | 833                        | 60                         |
| contig_4967   | GCTTCATGTGACGTTTCGTGT     | CAAGCATCTGGACGATGGGA      | 946                        | 58                         |
| contig_5080   | AGTGCAACCCCTAGCTGTGT      | TGAAGTGATGCGGACCTGGG      | 765                        | 60                         |
| contig_5414-1 | GTGATTAGACGCCAAGGGT       | GGAAGTACAAAGCAACTCCATCA   | 610                        | 60                         |
| contig_5414-2 | GCAGCGCCTCGAACATTTTGC     | CCGTCAGCAAACCCCTTTCCTGA   | 1360                       | 60                         |
| contig_5934   | GGTTGGTGGGTGGGTTCTCG      | GCTCAAATGTGCGGTGCGG       | 745                        | FAILED                     |
| contig_6345   | TCATGAGTTTGGACCTTTGGA     | TGGTTGTATGATGCTATGGTGTG   | 720                        | 55                         |
| contig_7057   | TGGACATCATGGCACTGTCCACAA  | CCTCTAGTACCTACACTTGACCC   | 964                        | 60                         |
| contig_7250   | TGGCGCTTATACCCACAAG       | CTGTAGCAGTTCCACCCTAC      | 885                        | 55                         |
| contig_7552   | GCAGCGAAAGGAGAAGAGGATAT   | TCGTGCCATCCCATGAAGTACA    | 904                        | 55                         |
| contig_8257   | ACAGCAGGGGAGAGGCGAAA      | ACGCAACAGGTCAAAGGAGTCAGT  | 1298                       | 60                         |
| contig_8391   | CAGTGTAATGCCCTCCAGGT      | AGCATCAATCCCAGCCAACAGA    | 854                        | 60                         |
| contig_8418   | TCCCCTTCAATGAGCCCCTCCA    | ACCAGATGCTGCCACCGATGA     | 1405                       | 60                         |
| contig_10390  | CCGAAGCCCCTTTGCACTCA      | TTTCATCCCGCCAACCACCC      | 964                        | FAILED                     |
| contig_10984  | CTGCAAGCCGCATATTACCG      | AATCCCCGAGCAGTTCATGG      | 700                        | 55                         |
| contig_11660  | CAGTTGTGCGGTGTGGAGCT      | CAGCTCGGTGTGTTCCGGTT      | 1468                       | 60                         |
| contig_11653  | CCGTTCTTCATGTGGGCTTGGC    | GCGTGTGTTGTGGTGTGTCAGTTGC | 862                        | 63                         |

|                |                         |                         |      |        |
|----------------|-------------------------|-------------------------|------|--------|
| contig_13973-1 | TGGCATTGGGAGGGTTGTGATTC | GGAAGAGAAGGCAAGGACGAGCA | 1003 | 63     |
| contig_13973-2 | AGGGCTTCTAACATCCACCGCG  | CACATCCAGCCTCAAACCAGCC  | 1030 | 63     |
| contig_14304   | GAGATCGTGGGGTCGCAGC     | GTGTGGGGCCATTTCTCAAAGT  | 871  | 60     |
| contig_14333-1 | TGGGTTGTTTTGTGCAGCGC    | ATGACCCTGGTAGCCGCAAC    | 1453 | 60     |
| contig_14333-2 | ACATGGGACTCGGAAAGA      | GTAGAATGGGACGAAGGG      | 600  | 55     |
| contig_15601   | ATTCTACGTCTAGGAACG      | CTTTAACGGATGTAGCAG      | 814  | 60     |
| contig_18594   | GCCTGAGACAAGGGGAAGGT    | CGGTCAGGGAGGAGGAGATCA   | 976  | 60     |
| contig_21378   | GCTGCGATGGATTGTAAGGCC   | GCTACGGGAGGAAAGGTCTAGC  | 1323 | 63     |
| contig_26250   | GTCCAAGAGAAGGCACCACTGG  | ACCAACCCTTCCACCCACAGAC  | 831  | 63     |
| contig_25459   | TGAAGGTGGTGGAGGAGGAG    | GCTGGGTCATATCTTGCGGTCTT | 952  | FAILED |
| contig_49487   | CCATCCGAGTTGCTGCCCC     | CAGGTTACGATACAAAAGGGCGA | 657  | FAILED |

1

2

3 **Supplementary Table S2. Details of primer pairs designed for CRNIL1A-specific contigs.**

4 Two pairs of primers (separated by a suffix '-1' or '-2') were used for four of these contigs

5 while only a single one was designed for each of the other contigs.

6

7

8

9

10

11

12

13

14

15

16

17

1

| Contig name   | Forward primer (5'-3')     | Reverse primer (5'-3')    | Expected/Product size (bp) |         | Annealing temperature (°C) |
|---------------|----------------------------|---------------------------|----------------------------|---------|----------------------------|
|               |                            |                           | NIL1A                      | CS      |                            |
| contig_6733   | TGATTGCAGCTCCCATGTGATTG    | GGAGATGATGAGATGAGGCGAGG   | 468/468                    | 269/269 | 55                         |
| contig_12030  | AGGCTGAACTCAAGATGGGCGA     | CGTGCAAGTGCCGGAATGCC      | 1113/1113                  | 806/806 | 64                         |
| contig_12058  | ACTTGGCTCAACTGCTGACATTCA   | AGCCACTTTTGTCTTTTGCCTTCA  | 577/577                    | 469/469 | 60                         |
| contig_12439  | GCAGGGCTACATCTGGCGAA       | GGCTTCGTGTTTCATCCGCC      | 585/585+463                | 463/463 | 58                         |
| contig_21961  | GGTGTGGCCCTGCAGTATCA       | GACGCACGTTTCTCACAGTATACG  | 423/423                    | 280/280 | 60                         |
| contig_25041  | GTCCACAACCTCCACCCAGT       | GGTCACCTCTCCGCCATTG       | 699/699                    | 608/608 | 60                         |
| contig_30101  | CAATGGGGCTAGAAGGAGTAAACA   | GGTTGAGCGATATTAGGGATAGGGT | 617/617                    | 351/351 | 55                         |
| contig_31593  | GGCTTCATTTCCGCTTGTAACA     | TCATGTGTACTTGTCTACGGGCT   | 1049/1049                  | 838/838 | 63                         |
| contig_32554  | CGTGTGATGTTTCGTATTCTAGGGGA | TCCAGCCCTCTTAATCCCACCA    | 300/300                    | 230/230 | 60                         |
| contig_33506  | GGACCGCTTGCATCATTGTCGT     | TCTGTCTTCTTCGCCACCGCT     | 1246/#                     | 568/#   | FAILED                     |
| contig_45337  | TGTCAGAAACCAGAATCAGGAACAC  | AGGACTGAAACGCTACCATCACA   | 1601/1601                  | 235/235 | 60                         |
| contig_46411  | GCGCCTGACTGATGCATTGC       | ATTGTGCCACCCTTTTGC        | 1963/1963                  | 673/673 | 60                         |
| contig_57900  | GTGCCCGACAAGCCTACCAT       | AGCCCTTGATGCAGATCCTT      | 1036/1036                  | 599/599 | 63                         |
| contig_67719  | TGGCCCTTTAGTCAACACCCCT     | CCCTACGGTTTCTAGCTAGCACACA | 991/991                    | 568/568 | 60                         |
| contig_76140  | TCATGCCCTACCCTCCCTGT       | TCCTCTCCACTAGCAGCACACA    | 574/574                    | 461/461 | 60                         |
| contig_76584  | GGCACCCGAACTATGGGCGA       | GGAGGTCCCCATGTGAGGCC      | 1853/1853                  | 836/836 | 64                         |
| contig_96175  | GACGGAAAGCAGTAATCAATCGC    | AAATGAGCCAAGGGAACAACATATG | 452/452                    | 343/343 | 55                         |
| contig_97492  | CAGGGCTTTGGTTGGTGGGAA      | ACAAGGGAAGTGCGGAGATGT     | 967/967                    | 724/724 | 63                         |
| contig_102975 | CGCGCCATCTCAGCTTTCT        | TTCCCGACCGTCCGTTTCAG      | 627/627+425                | 425/425 | 60                         |
| contig_112318 | CTGTGCTAGATGTCCACGAATCTGA  | AGCTGTGAGGAAGATGGTTTGTCA  | 582/582                    | 499/499 | 55                         |
| contig_117260 | GACGTGGCTCTCTCTCGCGG       | CTGCCTCCAACGCTGACCCA      | 2303/#                     | 477/#   | FAILED                     |
| contig_128179 | TCAAATCACCCAGGAAAGCACACA   | ACTCCATGCCCTTCACGTTTTA    | 876/876                    | 464/464 | 58                         |
| contig_143704 | GCTCAGCAAAGAACCTCTGCTCG    | AGTGAAGATATACCTGGCCGTCT   | 2516/#                     | 524/#   | FAILED                     |
| contig_163046 | GCACTCATAGGGGCGAGCGTT      | GCCACTAACTCCACGCACGT      | 882/882                    | 652/652 | 63                         |

2

3

#### 4 **Supplementary Table S3. Details of primer pairs targeting long insertions in CRNIL1A**

5 **compared with CS. # indicates that no PCR product was detected.**

6

| Contig name   | Allele type | Geographical origin |        |        |         |
|---------------|-------------|---------------------|--------|--------|---------|
|               |             | Asia                | Africa | Europe | America |
| contig_22     | CS          | 19                  | 9      | 2      | 0       |
|               | CRNIL1A     | 48                  | 34     | 58     | 56      |
| contig_55     | CS          | 41                  | 10     | 7      | 16      |
|               | CRNIL1A     | 26                  | 33     | 53     | 40      |
| contig_153    | CS          | 51                  | 18     | 14     | 8       |
|               | CRNIL1A     | 16                  | 25     | 46     | 48      |
| contig_368    | CS          | 43                  | 14     | 29     | 16      |
|               | CRNIL1A     | 24                  | 29     | 31     | 40      |
| contig_780    | CS          | 15                  | 3      | 6      | 7       |
|               | CRNIL1A     | 52                  | 40     | 54     | 49      |
| contig_842    | CS          | 25                  | 6      | 2      | 8       |
|               | CRNIL1A     | 42                  | 37     | 58     | 48      |
| contig_1493   | CS          | 51                  | 39     | 58     | 48      |
|               | CRNIL1A     | 16                  | 4      | 2      | 8       |
| contig_1515   | CS          | 11                  | 41     | 55     | 48      |
|               | CRNIL1A     | 56                  | 2      | 5      | 8       |
| contig_1870   | CS          | 52                  | 39     | 58     | 48      |
|               | CRNIL1A     | 15                  | 4      | 2      | 8       |
| contig_2985   | CS          | 44                  | 20     | 12     | 30      |
|               | CRNIL1A     | 23                  | 23     | 48     | 26      |
| contig_2986   | CS          | 64                  | 29     | 55     | 24      |
|               | CRNIL1A     | 3                   | 14     | 5      | 32      |
| contig_3339   | CS          | 19                  | 8      | 2      | 4       |
|               | CRNIL1A     | 48                  | 35     | 58     | 52      |
| contig_3833   | CS          | 65                  | 37     | 38     | 48      |
|               | CRNIL1A     | 2                   | 6      | 22     | 8       |
| contig_4048-1 | CS          | 64                  | 29     | 53     | 24      |
|               | CRNIL1A     | 3                   | 14     | 7      | 32      |
| contig_4048-2 | CS          | 64                  | 29     | 53     | 24      |
|               | CRNIL1A     | 3                   | 14     | 7      | 32      |
| contig_4967   | CS          | 64                  | 29     | 55     | 32      |
|               | CRNIL1A     | 3                   | 14     | 5      | 24      |
| contig_5080   | CS          | 15                  | 2      | 0      | 2       |



|                |         |    |    |    |    |
|----------------|---------|----|----|----|----|
|                | CRNIL1A | 52 | 41 | 60 | 54 |
| contig_5414-1  | CS      | 61 | 17 | 29 | 40 |
|                | CRNIL1A | 6  | 26 | 31 | 16 |
| contig_5414-2  | CS      | 61 | 18 | 29 | 40 |
|                | CRNIL1A | 6  | 25 | 31 | 16 |
| contig_6345    | CS      | 20 | 6  | 10 | 13 |
|                | CRNIL1A | 47 | 37 | 50 | 43 |
| contig_7057    | CS      | 55 | 25 | 43 | 8  |
|                | CRNIL1A | 12 | 18 | 17 | 48 |
| contig_7250    | CS      | 32 | 12 | 7  | 8  |
|                | CRNIL1A | 35 | 31 | 53 | 48 |
| contig_7552    | CS      | 65 | 31 | 57 | 40 |
|                | CRNIL1A | 2  | 12 | 3  | 16 |
| contig_8257    | CS      | 41 | 6  | 7  | 16 |
|                | CRNIL1A | 26 | 37 | 53 | 40 |
| contig_8391    | CS      | 65 | 37 | 42 | 48 |
|                | CRNIL1A | 2  | 6  | 18 | 8  |
| contig_8418    | CS      | 50 | 41 | 58 | 48 |
|                | CRNIL1A | 17 | 2  | 2  | 8  |
| contig_11660   | CS      | 23 | 9  | 12 | 3  |
|                | CRNIL1A | 44 | 34 | 48 | 53 |
| contig_11653   | CS      | 52 | 41 | 50 | 54 |
|                | CRNIL1A | 15 | 2  | 10 | 2  |
| contig_13973-1 | CS      | 61 | 27 | 49 | 32 |
|                | CRNIL1A | 6  | 16 | 11 | 24 |
| contig_13973-2 | CS      | 61 | 27 | 49 | 32 |
|                | CRNIL1A | 6  | 16 | 11 | 24 |
| contig_14304   | CS      | 43 | 14 | 12 | 24 |
|                | CRNIL1A | 24 | 29 | 48 | 32 |
| contig_14333-1 | CS      | 5  | 2  | 5  | 8  |
|                | CRNIL1A | 62 | 41 | 55 | 48 |
| contig_14333-2 | CS      | 6  | 2  | 5  | 9  |
|                | CRNIL1A | 61 | 41 | 55 | 47 |
| contig_15601   | CS      | 43 | 12 | 26 | 24 |
|                | CRNIL1A | 24 | 31 | 34 | 32 |
| contig_18594   | CS      | 65 | 37 | 38 | 48 |
|                | CRNIL1A | 2  | 6  | 22 | 8  |

|               |         |    |    |    |    |
|---------------|---------|----|----|----|----|
| contig_21378  | CS      | 65 | 31 | 57 | 40 |
|               | CRNIL1A | 2  | 12 | 3  | 16 |
| contig_26250  | CS      | 58 | 6  | 43 | 40 |
|               | CRNIL1A | 9  | 37 | 17 | 16 |
| contig_6733   | CS      | 48 | 27 | 18 | 37 |
|               | CRNIL1A | 19 | 16 | 42 | 19 |
| contig_12030  | CS      | 12 | 27 | 50 | 40 |
|               | CRNIL1A | 55 | 16 | 10 | 16 |
| contig_12058  | CS      | 50 | 19 | 11 | 24 |
|               | CRNIL1A | 17 | 24 | 49 | 32 |
| contig_21961  | CS      | 30 | 6  | 7  | 16 |
|               | CRNIL1A | 37 | 36 | 53 | 39 |
| contig_25041  | CS      | 55 | 8  | 7  | 24 |
|               | CRNIL1A | 12 | 35 | 53 | 32 |
| contig_30101  | CS      | 49 | 25 | 58 | 32 |
|               | CRNIL1A | 18 | 16 | 2  | 24 |
| contig_31593  | CS      | 48 | 35 | 49 | 50 |
|               | CRNIL1A | 19 | 8  | 11 | 6  |
| contig_32554  | CS      | 28 | 15 | 38 | 8  |
|               | CRNIL1A | 37 | 28 | 20 | 48 |
| contig_45337  | CS      | 20 | 6  | 33 | 8  |
|               | CRNIL1A | 43 | 37 | 25 | 48 |
| contig_46411  | CS      | 2  | 0  | 0  | 0  |
|               | CRNIL1A | 65 | 43 | 60 | 56 |
| contig_57900  | CS      | 29 | 10 | 10 | 5  |
|               | CRNIL1A | 37 | 33 | 60 | 50 |
| contig_67719  | CS      | 36 | 37 | 57 | 48 |
|               | CRNIL1A | 30 | 6  | 2  | 8  |
| contig_76140  | CS      | 60 | 16 | 47 | 24 |
|               | CRNIL1A | 7  | 27 | 13 | 32 |
| contig_76584  | CS      | 21 | 0  | 8  | 0  |
|               | CRNIL1A | 46 | 43 | 52 | 54 |
| contig_96175  | CS      | 62 | 37 | 50 | 32 |
|               | CRNIL1A | 5  | 6  | 10 | 24 |
| contig_97492  | CS      | 65 | 24 | 53 | 16 |
|               | CRNIL1A | 2  | 19 | 7  | 40 |
| contig_112318 | CS      | 63 | 34 | 47 | 40 |

|               |         |    |    |    |    |
|---------------|---------|----|----|----|----|
|               | CRNIL1A | 4  | 9  | 10 | 16 |
| contig_128179 | CS      | 36 | 29 | 58 | 38 |
|               | CRNIL1A | 31 | 13 | 2  | 16 |
| contig_163046 | CS      | 3  | 0  | 0  | 0  |
|               | CRNIL1A | 64 | 42 | 60 | 55 |

1

2

3 **Supplementary Table S4. Numbers of the ‘CS-type’ and ‘CRNIL1A-type’ alleles**

4 **detected by 56 pairs of primers among the 226 hexaploid wheat genotypes assessed.**

5
